# Supplementary material for: Directions of Changes in the Health Values of Dairy Products in the Opinion of Consumers
Source: MDPI journal article supplement (doi:10.3390/nu13061945), 2021-06-05
Supplement: s1 [file s1]

# Directions of Changes in the Health Values of Dairy Products in the Opinion of Consumers

Marta Sajdakowska \*, Jerzy Gębski and Krystyna Gutkowska

**Supplementary Questionnaire 1.** Questionnaire used in the study (N = 983).

**1. Do you approve of enhancing the health benefits of dairy products?**

- (1) yes
- (2) no

**2. Do you think it is possible to enhance the nutritional value of dairy products?**

- (1) yes
- (2) no

**3. Please indicate which of the given properties of dairy products you consider to be the most characteristic of dairy products with high health value. Please indicate no more than 4 answers.**

They ...

- (1) have a positive effect on your silhouette
- (2) contain no preservatives
- (3) contain the addition of live bacteria cultures
- (4) have a short shelf life
- (5) are little processed
- (6) have low levels of selected ingredients, e.g. salt, sugar, fat
- (7) have a high mineral and vitamin content
- (8) are recommended by scientific institutions
- (9) the packaging carries information indicating its health benefits, e.g. "Contributes to lowering cholesterol levels"
- (10) contain no ingredients that may cause allergies
- (11) do not contain food colors
- (12) are produced with respect for the rights of farm animals

**4. Please indicate which of the given characteristics of dairy products you consider to be most characteristic of dairy products with high nutritional value. Please indicate not more than 4 answers.**

They ...

- (1) contain a lot of vitamins and minerals
- (2) are rich in essential fatty acids
- (3) contain a lot of fat
- (4) contain a lot of protein
- (5) contain a lot of cholesterol
- (6) contain a lot of fiber
- (7) contain a lot of omega-3 fatty acids
- (8) contain live bacteria cultures
- (9) have information on the packaging that informs about the nutritional benefits, e.g. „Rich in protein“, „With increased calcium content“, „Sugar-free“

(10) high in calories

**5. Do you think that the content of the following ingredients in dairy products should be increased? Please use a scale from 1-7 where 1 means "definitely should not be increased" and 7 means "definitely should be increased"**

- (1) minerals
- (2) fiber
- (3) cholesterol-lowering ingredients
- (4) omega-3 fatty acid
- (5) live bacteria cultures
- (6) protein
- (7) coenzyme Q10

**6. Would you consider buying the following types of yogurt? Please use a scale from 1-7, where 1 means "definitely not" and 7 means "definitely yes"**

- (1) with increased levels of certain vitamins and minerals to prevent deficiencies
- (2) with added food colors
- (3) with added omega-3 fatty acids
- (4) with information on the packaging such as "Helps lower cholesterol"
- (5) with a longer shelf life
- (6) with information on the package such as "Sugar-free"
- (7) with ingredients that may cause allergies removed, e.g. milk and dairy products
- (8) with added selenium
- (9) thickened by the addition of various ingredients
- (10) with reduced levels of certain ingredients, e.g. salt or sugar to prevent various diseases, e.g. obesity, hypertension, diabetes
- (11) with added coenzyme Q10
- (12) with added calcium
- (13) with added zinc
- (14) with added magnesium
- (15) with increased levels of substances with beneficial health effects
- (16) with a simple message on the package such as "High protein content"
- (17) with a reduced level of fat
- (18) in which selected ingredients have been replaced with others, e.g. sugar with sweeteners
- (19) with added fiber.
